# Supplementary material for: Knockdown of GmD53a confers strigolactones mediated rhizobia interaction and promotes nodulation in soybean
Source: PeerJ. 2022 Jan 20;10:e12815. doi: 10.7717/peerj.12815 (PMC8784017; doi:10.7717/peerj.12815)
Supplement: Supplemental Information 3 [file peerj-10-12815-s003.xlsx]

## Sheet: Tissue specific expression
		Ct value					Average	SD	SE
	Seed-GmD53	27.5208	12.4792	5709.79	262459	0.021755	0.0258914	0.00407139	0.0023534
		27.2162	12.7838	7051.96	235895	0.0298945							Average	SD	SE
		27.3685	12.6315	6380.87	249177	0.0260246						Seed-GmD53	0.0258914	0.00407139	0.0023534
	Root-GmD53	29.6227	10.3773	1330.11	31764.6	0.041874	0.0405341	0.00149	0.0010493			Root-GmD53	0.0405341	0.00149	0.0010493
		29.5166	10.4834	1431.56	35998.8	0.0397668						Nod-GmD53	0.14063	0.0140218	0.00987448
		29.5696	10.4304	1380.84	33881.7	0.0399615						Stem-GmD53	0.155068	0.0153268	0.0107935
	Nod-GmD53	30.9238	9.07616	539.755	3577.58	0.150871	0.14063	0.0140218	0.00987448			Leaf-GmD53	0.0370097	0.00435385	0.00306609
		30.7233	9.27666	620.228	4733.07	0.131041						Flower-GmD53	0.0432073	0.00927306	0.00653033
		30.8236	9.17641	579.992	4155.33	0.139976						Pod-GmD53	0.130177	0.0130988	0.00922448
	Stem-GmD53	25.07	14.93	31216	216287	0.144327	0.155068	0.0153268	0.0107935
		24.97	15.03	33456.5	201543	0.166002
		25.02	14.98	32336.3	208915	0.154874
	Leaf-GmD53	25.0759	14.9241	31089.4	775291	0.0401003	0.0370097	0.00435385	0.00306609
		25.2249	14.7751	28038.9	826058	0.0339431
		25.1504	14.8496	29564.2	800675	0.0369858
	Flower-GmD53	27.2212	12.7788	7027.46	191587	0.0366802	0.0432073	0.00927306	0.00653033
		27.8261	12.1739	4620.6	92793.8	0.0497943
		27.5237	12.4763	5824.03	142190	0.0431474
	Pod-GmD53	24.96	15.04	33689.2	278320	0.121045	0.130177	0.0130988	0.00922448
		25.08	14.92	31000.4	222115	0.139569
		25.02	14.98	32344.8	250217	0.129917
	Seed-Actin	21.9983	18.0017	262459
		22.1522	17.8478	235895
		22.0752	17.9248	249177
	Root-Actin	25.0449	14.9551	31764.6
		24.8643	15.1357	35998.8
		24.9546	15.0454	33881.7
	Nod-Actin	28.1952	11.8048	3577.58
		27.7914	12.2086	4733.07
		27.9933	12.0067	4155.33
	Stem-Actin	22.2774	17.7226	216287
		22.3793	17.6207	201543
		22.3283	17.6717	208915
	Leaf-Actin	20.4356	19.5644	775291
		20.3441	19.6559	826058
		20.3899	19.6101	800675
	Flower-Actin	22.4524	17.5476	191587
		23.4983	16.5017	92793.8
		22.9753	17.0247	142190
	Pod-Actin	21.9136	18.0864	278320
		22.2391	17.7609	222115
		22.0763	17.9237	250217

## Sheet: Nod stages
		Ct value					Average	SD	SE
	D53-Root	30.1228	9.8772	940.448	15469.4	0.0607939	0.0640083	0.00324783	0.00187736
		29.907	10.093	1092.17	16231.1	0.0672886
		30.0149	9.98509	1016.31	15850.3	0.0639424
	D53-NOD1	29.1753	10.8247	1813.62	6307.79	0.360734	0.347796	0.0130719	0.00755602				GmD53	SD	SE
		28.9566	11.0434	2110.55	5027.59	0.334594						Root	0.0640083	0.00324783	0.00187736
		29.066	10.934	1962.08	5667.69	0.34806						NOD-1	0.347796	0.0130719	0.00755602
	D53-NOD2	26.4469	13.5531	12019.6	19349.4	0.823472	0.75715	0.0661969	0.0382641			NOD-2	0.75715	0.0661969	0.0382641
		26.2931	13.7069	13372	14596.3	0.691079						NOD-3	0.682287	0.0304658	0.0176103
		26.37	13.63	12695.8	16972.9	0.7569						NOD-4	0.599961	0.00913424	0.00527991
	D53-NOD3	27.0307	12.9693	8019.58	12274.2	0.653368	0.682287	0.0304658	0.0176103			NOD-5	0.571603	0.0270473	0.0156343
		26.8036	13.1964	9386.41	13144.5	0.714094						NOD-6	0.493643	0.039303	0.0227185
		26.9172	13.0828	8703	12709.4	0.6794
	D53-NOD4	27.3601	12.6399	6382.42	10506.8	0.607458	0.599961	0.00913424	0.00527991
		27.2475	12.7525	6900.67	11700.3	0.589787
		27.3038	12.6962	6641.54	11103.5	0.602637
	D53-NOD5	27.9686	12.0314	4186.14	7632.46	0.548466	0.571603	0.0270473	0.0156343
		27.8031	12.1969	4694.9	7807.41	0.601339
		27.8859	12.1141	4440.52	7719.93	0.565003
	D53-NOD6	27.9746	12.0254	4168.7	7876.35	0.529267	0.493643	0.039303	0.0227185
		28.2475	11.7525	3450.22	7641.99	0.451481
		28.1111	11.8889	3809.46	7759.17	0.500181
	Actin-Root	26.0829	13.9171	15469.4
		26.0135	13.9865	16231.1
		26.0482	13.9518	15850.3
	Actin-NOD1	27.3771	12.6229	6307.79
		27.7043	12.2957	5027.59
		27.5407	12.4593	5667.69
	Actin-NOD2	25.76	14.24	19349.4
		26.1667	13.8333	14596.3
		25.9633	14.0367	16972.9
	Actin-NOD3	26.4167	13.5833	12274.2
		26.3178	13.6822	13144.5
		26.3672	13.6328	12709.4
	Actin-NOD4	26.641	13.359	10506.8
		26.4857	13.5143	11700.3
		26.5634	13.4366	11103.5
	Actin-NOD5	27.1021	12.8979	7632.46
		27.0694	12.9306	7807.41
		27.0857	12.9143	7719.93
	Actin-NOD6	27.0567	12.9433	7876.35
		27.1003	12.8997	7641.99
		27.0785	12.9215	7759.17

## Sheet: Gene expression level
		Mean
	GUS	0.0243333
	GmD53a-KD	0.0108333
		P value	0.001
		Mean ± SEM of column A	0.0245 ± 0.001443 N=3
		Mean ± SEM of column B	0.01083 ± 0.0006642 N=3
		Difference between means	-0.01367 ± 0.001589
		95% confidence interval	-0.01808 to -0.009255
	GUS	0.028	0.0243333
		0.022
		0.023
	GmD53a-KD	0.011	0.0108333
		0.0097
		0.0118

## Sheet: Rhizobia infection
		Ct value					Average	SD	SE
	GmD53-0hr	33.1015	6.8985	119.304	13053	0.00913999	0.00939589	0.000259981	0.000150278
		32.8383	7.16171	143.182	14822.5	0.00965977
		32.9699	7.0301	131.243	13937.7	0.0093879							GUS	GmD53a-KD	SD-GUS	SD-GmD53a-KD	SE-GUS	SE-GmD53
	GmD53-6hr	33.8501	6.1499	71.0075	3721.29	0.0190814	0.0211193	0.00203462	0.00117608			0h	0.0187999	0.00939589	0.000519778	0.000259981	0.00030045	0.000150278
		33.6113	6.3887	83.7896	3619.32	0.0231507						6h	0.0156996	0.0211193	0.00126053	0.00203462	0.000728629	0.00117608
		33.7307	6.2693	77.3986	3670.3	0.0211259						12h	0.00742555	0.020976	0.00247418	0.00100928	0.00143016	0.000583397
	GmD53-12hr	33.0926	6.90742	120.044	5469.9	0.0219463	0.020976	0.00100928	0.000583397			24h	0.0103967	0.0306073	0.0026249	0.00269986	0.00151728	0.00156061
		33.653	6.34696	81.4004	4083.95	0.0199318						36h	0.0500738	0.0421291	0.000927712	0.00502153	0.00053625	0.00290262
		33.3728	6.62719	100.722	4776.92	0.02105						48h	0.0373685	0.0481003	0.00454388	0.00266012	0.00262652	0.00153764
	GmD53-24hr	32.1778	7.82218	226.313	6795.02	0.0333058	0.0306073	0.00269986	0.00156061
		32.5254	7.47457	177.856	6373.4	0.027906
		32.3516	7.64837	202.085	6584.21	0.03061
	GmD53-36hr	32.8306	7.16936	143.944	3875.94	0.0371378	0.0421291	0.00502153	0.00290262
		32.3538	7.64617	200.32	4245.85	0.0471803
		32.5922	7.40776	172.132	4060.89	0.0420691
	GmD53-48hr	32.3376	7.66238	202.584	3991.02	0.05076	0.0481003	0.00266012	0.00153764
		31.953	8.04698	264.473	5820.3	0.0454398
		32.1453	7.85468	233.529	4905.66	0.0481012
	GUS-0hr	32.1015	7.8985	238.608	13053	0.01828	0.0187999	0.000519778	0.00030045
		31.8383	8.16171	286.365	14822.5	0.0193195
		31.9699	8.0301	262.486	13937.7	0.0188001
	GUS-6hr	34.0204	5.9796	63.1015	3721.29	0.0169569	0.0156996	0.00126053	0.000728629
		34.2927	5.7073	52.248	3619.32	0.0144359
		34.1565	5.84345	57.6747	3670.3	0.0157059
	GUS-12hr	35.2399	4.76012	27.0981	5469.9	0.00495404	0.00742555	0.00247418	0.00143016
		34.663	5.33696	40.4191	4083.95	0.00989706
		34.9515	5.04854	33.7586	4776.92	0.0072265
	GUS-24hr	34.2778	5.72218	52.7895	6795.02	0.00776884	0.0103967	0.0026249	0.00151728
		33.6254	6.37457	82.973	6373.4	0.0130186
		33.9516	6.04837	67.8812	6584.21	0.0104027
	GUS-36hr	32.4306	7.56936	189.935	3875.94	0.0490036	0.0500738	0.000927712	0.00053625
		32.2538	7.74617	214.698	4245.85	0.0505666
		32.3422	7.65776	202.317	4060.89	0.050651
	GUS-48hr	32.6076	7.39238	168.007	3991.02	0.0420963	0.0373685	0.00454388	0.00262652
		32.413	7.58698	192.268	5820.3	0.0330341
		32.5103	7.48968	180.138	4905.66	0.036975
	Actin-0hr	26.3279	13.6721	13053
		26.1445	13.8555	14822.5
		26.2362	13.7638	13937.7
	Actin-6hr	28.1384	11.8616	3721.29
		28.1785	11.8215	3619.32
		28.1585	11.8415	3670.3
	Actin-12hr	27.5827	12.4173	5469.9
		28.0043	11.9957	4083.95
		27.7935	12.2065	4776.92
	Actin-24hr	27.2697	12.7303	6795.02
		27.3622	12.6378	6373.4
		27.3159	12.6841	6584.21
	Actin-36hr	28.0797	11.9203	3875.94
		27.9482	12.0518	4245.85
		28.0139	11.9861	4060.89
	Actin-48hr	28.0375	11.9625	3991.02
		27.4931	12.5069	5820.3
		27.7653	12.2347	4905.66

## Sheet: Nodulation number data
					RiD53	H.R wt	Nod. No	ratio	Average	SD	GUS		H.R WT	NOD. No	ratio	Average	SD
					1	3.16	97	30.6962	30.9091	2.82531	1		1.99	37	18.593	20.5921	2.54456
					2	3.9	109	27.9487			2		1.22	29	23.7705
					3	2.44	83	34.0164			3		1.35	30	22.2222
					4	2.16	59	27.3148			4		2.14	48	22.4299
					5	0.92	31	33.6957			5		3.4	65	19.1176
					6	2.58	82	31.7829			6		3.1	54	17.4194
										P-value
										<.0001

## Sheet: Nod pathway gene expression
		ct value	actin ct value		Average	SD
	GmDMI2α	32.4585	24.5911	0.00428211	0.00449679	0.000211979				GmDMI2α					GmNINα
		32.357	24.6257	0.00470596					GUS	0.029682				GUS	0.00673155
		32.4078	24.6084	0.0045023					GmD53-KD	0.00449679				GmD53-KD	0.00360482
	GmDMI2β	31.7125	24.5911	0.00718204	0.00716363	5.86382e-05			P value	< 0.0001				P value	0.064
		31.7413	24.6257	0.00721086					Mean ± SEM of column A	0.02977 ± 0.0001202 N=3				Mean ± SEM of column A	0.006717 ± 0.0006525 N=3
		31.7269	24.6084	0.007098					Mean ± SEM of column B	0.004497 ± 0.0001224 N=3				Mean ± SEM of column B	0.003605 ± 0.0001929 N=3
	GmDMI13α	35.0763	24.5911	0.000697624	0.000709493	1.028e-05			Difference between means	-0.02527 ± 0.0001716				Difference between means	-0.003112 ± 0.0006805
		35.075	24.6257	0.000715254					95% confidence interval	-0.02575 to -0.02479				95% confidence interval	-0.005001 to -0.001223
		35.0756	24.6084	0.0007156
	GmDMI13β	28.6527	24.5911	0.0598859	0.0669268	0.00678996				GmDMI13α					GmNINβ
		28.3931	24.6257	0.0734344					GUS	0.00167407				GUS	0.000491396
		28.5229	24.6084	0.06746					GmD53-KD	0.000709493				GmD53-KD	0.000100355
	GmNFR1α	30.8275	24.5911	0.0132629	0.0116528	0.00140157			P value	0.0001				P value	< 0.0001
		31.1712	24.6257	0.0107056					Mean ± SEM of column A	0.001683 ± 6.692e-005 N=3				Mean ± SEM of column A	0.0004967 ± 1.333e-005 N=3
		30.9994	24.6084	0.01099					Mean ± SEM of column B	0.0007097 ± 5.840e-006 N=3				Mean ± SEM of column B	0.0001003 ± 2.659e-006 N=3
	GmNFR1β	40.9015	24.5911	1.23047e-05	1.38928e-05	1.62047e-06			Difference between means	-0.0009737 ± 6.717e-005				Difference between means	-0.0003964 ± 1.360e-005
		40.599	24.6257	1.55438e-05					95% confidence interval	-0.001160 to -0.0007872				95% confidence interval	-0.0004341 to -0.0003587
		40.7503	24.6084	1.38298e-05
	GmNFR5α	28.3343	24.5911	0.0746749	0.0698834	0.00712032				GmDMI13β					GmNSP1α
		28.5779	24.6257	0.0646053					GUS	0.0346525				GUS	0.00851507
		28.4561	24.6084	0.07037					GmD53-KD	0.0669268				GmD53-KD	0.0180495
	GmNFR5β	38.6214	24.5911	5.97645e-05	5.49515e-05	4.74618e-06			P value	0.0014				P value	0.002
		38.9055	24.6257	5.02751e-05					Mean ± SEM of column A	0.03444 ± 0.001172 N=3				Mean ± SEM of column A	0.00844 ± 0.0005336 N=3
		38.7635	24.6084	5.48148e-05					Mean ± SEM of column B	0.06693 ± 0.003920 N=3				Mean ± SEM of column B	0.01805 ± 0.001237 N=3
	GmNINα	32.5771	24.5911	0.00394429	0.00360482	0.000334419			Difference between means	0.03249 ± 0.004092				Difference between means	0.009610 ± 0.001348
		32.8797	24.6257	0.00327569					95% confidence interval	0.02113 to 0.04385				95% confidence interval	0.005868 to 0.01335
		32.7284	24.6084	0.00359448
	GmNINβ	37.8088	24.5911	0.000104968	0.000100355	4.57916e-06				GmNFR1α					GmNSP1β
		37.9751	24.6257	9.58106e-05					GUS	0.00184798				GUS	0.000211418
		37.892	24.6084	0.000100285					GmD53-KD	0.0116528				GmD53-KD	0.00178642
	GmNSP1α	30.2182	24.5911	0.0202339	0.0180495	0.00214325			P value	0.0003				P value	< 0.0001
		30.596	24.6257	0.0159499					Mean ± SEM of column A	0.001827 ± 0.0001426 N=3				Mean ± SEM of column A	0.0002133 ± 6.667e-006 N=3
		30.4071	24.6084	0.0179647					Mean ± SEM of column B	0.01165 ± 0.0008092 N=3				Mean ± SEM of column B	0.001786 ± 9.120e-005 N=3
	GmNSP1β	33.6214	24.5911	0.00191246	0.00178642	0.000158265			Difference between means	0.009826 ± 0.0008216				Difference between means	0.001573 ± 9.145e-005
		33.9055	24.6257	0.0016088					95% confidence interval	0.007545 to 0.01211				95% confidence interval	0.001319 to 0.001827
		33.7635	24.6084	0.001838
	GmNSP2α	31.2771	24.5911	0.00971198	0.00945835	0.000229493				GmNFR1β					GmNSP2α
		31.3797	24.6257	0.00926506					GUS	0.000557872				GUS	0.00168289
		31.3284	24.6084	0.009398					GmD53-KD	1.38928e-05				GmD53-KD	0.00945835
	GmNSP2β	33.1088	24.5911	0.00272834	0.00264289	0.000132447			P value	< 0.0001				P value	< 0.0001
		33.2751	24.6257	0.00249032					Mean ± SEM of column A	0.0005633 ± 2.333e-005 N=3				Mean ± SEM of column A	0.00169 ± 0.0001646 N=3
		33.192	24.6084	0.00271					Mean ± SEM of column B	1.387e-005 ± 9.244e-007 N=3				Mean ± SEM of column B	0.009458 ± 0.0001325 N=3
	GmENOD40	28.9072	24.5911	0.0502026	0.0480992	0.00198218			Difference between means	-0.0005495 ± 2.335e-005				Difference between means	0.007768 ± 0.0002113
		29.0596	24.6257	0.0462659					95% confidence interval	-0.0006143 to -0.0004846				95% confidence interval	0.007182 to 0.008355
		28.9834	24.6084	0.047829
										GmNFR5α					GmNSP2β
	ACTIN	24.5911							GUS	0.0243625				GUS	0.000491396
		24.6257							GmD53-KD	0.0698834				GmD53-KD	0.00264289
		24.6084							P value	< 0.0001				P value	< 0.0001
									Mean ± SEM of column A	0.02424 ± 0.0003133 N=3				Mean ± SEM of column A	0.0004933 ± 1.202e-005 N=3
									Mean ± SEM of column B	0.06988 ± 0.002917 N=3				Mean ± SEM of column B	0.002643 ± 7.651e-005 N=3
									Difference between means	0.04565 ± 0.002934				Difference between means	0.002149 ± 7.745e-005
	GmDMI2α	31.1534	26.0768	0.0296339	0.029682	4.81166e-05			95% confidence interval	0.03750 to 0.05379				95% confidence interval	0.001934 to 0.002364
		31.3548	26.2828	0.0297301
		31.2541	26.1798	0.029682						GmNFR5β					GmENOD40
	GmDMI2β	33.99	26.0768	0.00414837	0.00449685	0.000351954			GUS	0.000105709				GUS	0.0264644
		33.97	26.2828	0.00485218					GmD53-KD	5.49515e-05				GmD53-KD	0.0480992
		33.98	26.1798	0.00449					P value	0.0011				P value	0.03
	GmDMI13α	35.4042	26.0768	0.00155652	0.00167407	0.000117549			Mean ± SEM of column A	0.0001098 ± 5.948e-006 N=3				Mean ± SEM of column A	0.02630 ± 0.006512 N=3
		35.4074	26.2828	0.00179162					Mean ± SEM of column B	5.497e-005 ± 2.744e-006 N=3				Mean ± SEM of column B	0.04810 ± 0.001145 N=3
		35.4058	26.1798	0.00167407					Difference between means	-5.483e-005 ± 6.550e-006				Difference between means	0.02180 ± 0.006612
	GmDMI13β	31.0131	26.0768	0.0326588	0.0344284	0.00203124			95% confidence interval	-7.302e-005 to -3.665e-005				95% confidence interval	0.003446 to 0.04016
		31.053	26.2828	0.0366463
		31.0331	26.1798	0.03398
	GmNFR1α	35.3603	26.0768	0.00160464	0.00182865	0.000245628
		35.1842	26.2828	0.00209132
		35.2723	26.1798	0.00179
	GmNFR1β	36.9895	26.0768	0.000518732	0.000561914	3.97612e-05
		36.9928	26.2828	0.000597011
		36.9911	26.1798	0.00057
	GmNFR5α	31.4657	26.0768	0.0238653	0.024235	0.000544053
		31.6129	26.2828	0.0248597
		31.5393	26.1798	0.02398
	GmNFR5β	39.2009	26.0768	0.000112003	0.000110473	1.03775e-05
		39.579	26.2828	9.9415e-05
		39.39	26.1798	0.00012
	GmNINα	33.5566	26.0768	0.00560204	0.0067177	0.00112977
		33.2739	26.2828	0.00786106
		33.4153	26.1798	0.00669
	GmNINβ	37.0057	26.0768	0.000512918	0.000497597	2.40536e-05
		37.3383	26.2828	0.000469874
		37.172	26.1798	0.00051
	GmNSP1α	33.1173	26.0768	0.00759588	0.00844005	0.000928333
		33.0107	26.2828	0.00943426
		33.064	26.1798	0.00829
	GmNSP1β	38.2009	26.0768	0.000224006	0.000214279	1.3528e-05
		38.579	26.2828	0.00019883
		38.39	26.1798	0.00022
	GmNSP2α	35.5566	26.0768	0.00140051	0.00168892	0.000282571
		35.2739	26.2828	0.00196526
		35.4153	26.1798	0.001701
	GmNSP2β	37.0057	26.0768	0.000512918	0.000494597	3.04371e-05
		37.3383	26.2828	0.000469874
		37.172	26.1798	0.000501
	GmENOD40	32.1173	26.0768	0.0151918	0.0262963	0.0112764
		31.0107	26.2828	0.0377371
		31.564	26.1798	0.02596
	GUS	ACTIN	26.0768
			26.2828
			26.1798
